# Supplementary material for: A benzoxazole-triphenylamine conjugated fluorogenic probe for specific detection of sarin gas mimic diethylchlorophosphate
Source: Royal Society of Chemistry journal article supplement (doi:10.1039/d3ay01819a), 2024-01-01
Supplement: d3ay01819a1.pdf [file d3ay01819a1.pdf]

*Supporting Information for*

**A Benzoxazole-triphenylamine Conjugated Fluorogenic Probe for Specific Detection of Sarin gas Mimic, Diethylchlorophosphate**

Tuhina Sultana<sup>a</sup>, Manas Mahato<sup>a</sup>, Najmin Tohora<sup>a</sup>, Sabbir Ahamed<sup>a</sup>, Arpita Maiti<sup>a</sup>, Susanta Ghanta<sup>b</sup> and Sudhir Kumar Das<sup>a\*</sup>

<sup>a</sup>Department of Chemistry, University of North Bengal, Raja Rammohunpur, Darjeeling, West Bengal-734013, India

<sup>b</sup>Department of Chemistry, National Institute of Technology, Agartala, Barjala, Jirania, Tripura-799046, India

Corresponding author: (Dr. S. K. Das; E-mail: [sudhirkumardas@nbu.ac.in](mailto:sudhirkumardas@nbu.ac.in))

**Table of contents**

| <b>Sl. No.</b>   | <b>Descriptions</b>                                                                                                                                                                                                                                                                                                                                                                                                                                 | <b>Page No.</b> |
|------------------|-----------------------------------------------------------------------------------------------------------------------------------------------------------------------------------------------------------------------------------------------------------------------------------------------------------------------------------------------------------------------------------------------------------------------------------------------------|-----------------|
| <b>Scheme S1</b> | Synthetic route for the preparation of 2-(4-aminophenyl) benzoxazole.                                                                                                                                                                                                                                                                                                                                                                               | 3               |
| <b>Fig. S1</b>   | <sup>1</sup> H NMR spectra of <b>PMPA</b> in CDCl <sub>3</sub> .                                                                                                                                                                                                                                                                                                                                                                                    | 4               |
| <b>Fig. S2</b>   | <sup>13</sup> C NMR spectra of <b>PMPA</b> in CDCl <sub>3</sub> .                                                                                                                                                                                                                                                                                                                                                                                   | 4               |
| <b>Fig. S3</b>   | High-resolution mass spectra (HRMS) of <b>PMPA</b> .                                                                                                                                                                                                                                                                                                                                                                                                | 5               |
| <b>Fig. S4</b>   | (a) UV-visible spectrophotometric titration spectra of <b>PMPA</b> (22 μM) upon steady addition of DCP (0- 49.2 μM) in water-DMSO (4:1) medium and (b) the change of absorption behavior with increasing concentration of DCP at wavelengths 326 nm and 390 nm, respectively. (c) The ratiometric [DCP] vs. log(A <sub>326</sub> /A <sub>390</sub> ) calibration curve quantifies the unknown concentration of DCP with minimal experimental error. | 5               |
| <b>Fig. S5</b>   | (a) Fluorometric titration spectrum of <b>PMPA</b> (22 μM) upon steady accumulation of DCP (0-53.6 μM) in water-DMSO (4:1) medium. (b) Fluorescence color before and after phosphorylation through CIE diagram, coordinates x = 0.1612, y = 0.0429 and x = 0.1629, y = 0.0176 respectively.                                                                                                                                                         | 6               |
| <b>Fig. S6</b>   | The bar plot on photoluminescence intensity changed at 392 nm of <b>PMPA</b> solution in pure DMSO medium in the presence of several OPs, IPs, and other toxic guest analytes.                                                                                                                                                                                                                                                                      | 6               |

|                 |                                                                                                                                                                                                                                                                                                                                                                                                                                                                                                                                    |       |
|-----------------|------------------------------------------------------------------------------------------------------------------------------------------------------------------------------------------------------------------------------------------------------------------------------------------------------------------------------------------------------------------------------------------------------------------------------------------------------------------------------------------------------------------------------------|-------|
| <b>Fig. S7</b>  | HRMS of phosphorylated product <b>PMPA</b> -DCP                                                                                                                                                                                                                                                                                                                                                                                                                                                                                    | 7     |
| <b>Fig. S8</b>  | Pseudo-first-order rate constant plot of <b>PMPA</b> (12.6 $\mu$ M) in the presence of DCP (90 $\mu$ M)                                                                                                                                                                                                                                                                                                                                                                                                                            | 7     |
| <b>Fig. S9</b>  | (i) long-length cuts of several Whatman filter papers. (ii) The filter papers were immersed into the <b>PMPA</b> solution (1mM). (iii) Photo on <b>PMPA</b> -loaded filter papers. Picture of long-length cuts of filter papers (iv) before (v) after drying. (vi) Taking each OPs, IPs and other analytes having similar concentration by micropipette. (vii) Sincerely add dropwise of each OP, IP, and other analytes into vials. (viii) Arranging the vials in order to add the analytes to perform the “dipstick” experiment. | 8     |
| <b>Fig. S10</b> | Emission spectra of <b>PMPA</b> solution in different spiked and unspiked soil samples such as (a) sand, (b) field, and (c) clay soil, respectively.                                                                                                                                                                                                                                                                                                                                                                               | 9     |
| <b>Fig. S11</b> | The characteristic photoluminescence photos of <b>PMPA</b> solution of different pesticides-spiked soil samples (a) boxer biostimulant, (b) cypermethrin, and (c) bifenthrin under 365 nm UV-lamp irradiation.                                                                                                                                                                                                                                                                                                                     | 9     |
| <b>Table S1</b> | Comparison table of various probes and technologies for detecting organophosphates.                                                                                                                                                                                                                                                                                                                                                                                                                                                | 9     |
| <b>Table S2</b> | Comparison table of various chemosensors introduced for detecting nerve agent stimulants in the last few decades with our probe <b>PMPA</b> .                                                                                                                                                                                                                                                                                                                                                                                      | 10-11 |

## 1. Materials and instrumentations

All reagents used in the synthetic procedure are purchased from Sigma-Aldrich, India, and TCI, India, respectively. All organophosphates used in the present study are purchased from Sigma-Aldrich, India, and TCI, India. HPLC-grade solvents are used for synthesis and spectroscopic studies purpose. For nuclear magnetic resonance (NMR) spectral analysis, deuterated chloroform ( $\text{CDCl}_3$ ) is used and obtained from Sigma Aldrich-India.  $^1\text{H}$  NMR and  $^{13}\text{C}$  NMR spectra are recorded on a Bruker 400 MHz instrument

at ambient conditions using tetramethylsilane (TMS) as a standard reference with chemical shifts ( $\delta$ ) in ppm unit. On an Agilent 6545XT AdvanceBio LC/Q-TOF spectrometer, high-resolution mass spectra (HRMS) have been performed. The UV-visible absorption spectrum study and photoluminescence experiments have been carried out on a HITACHI U-2910 and HITACHI F-7100 fluorimeter with 2.5 nm excitation and emission slit, respectively, under ambient environments. Excitation and emission wavelengths during the photoluminescence experiment are kept at 320 nm and 340-600 nm, respectively.

## 2. Synthesis of 2-(4-aminophenyl) benzoxazole (L)

2-(4-aminophenyl) benzoxazole is prepared by following the literature procedure. A mixture of 2-aminophenol (1 g, 9.17 mmol) and polyphosphoric acid (PPA) (20 g) is refluxed for 30 min at 120 °C, then added 4-aminobenzoic acid (1.3 g, 9.17 mmol) and again refluxed 4 hours at 120°C temperature, then poured the reaction mixture into an ice-cold water bath. The purified product was collected by column chromatography, and finally, the brownish solid of L was isolated (**Scheme S1**). Yield 85%  $^1\text{H}$  NMR (400 MHz, DMSO- $d_6$ , 25 °C)  $\delta$ (ppm): 6.01(s,2H), 6.68 (d, 2H), 7.35 (d, 2H), 7.66 (d, 2H), and 7.85 (d, 2H).

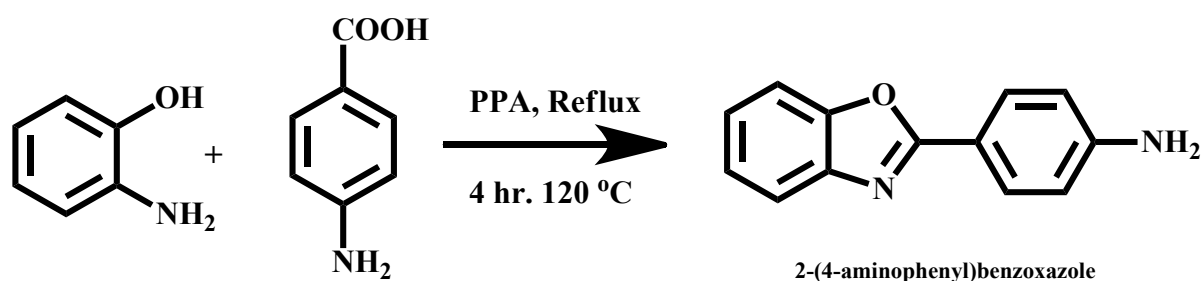

**Scheme S1** Synthetic route for preparing 2-(4-aminophenyl) benzoxazole.

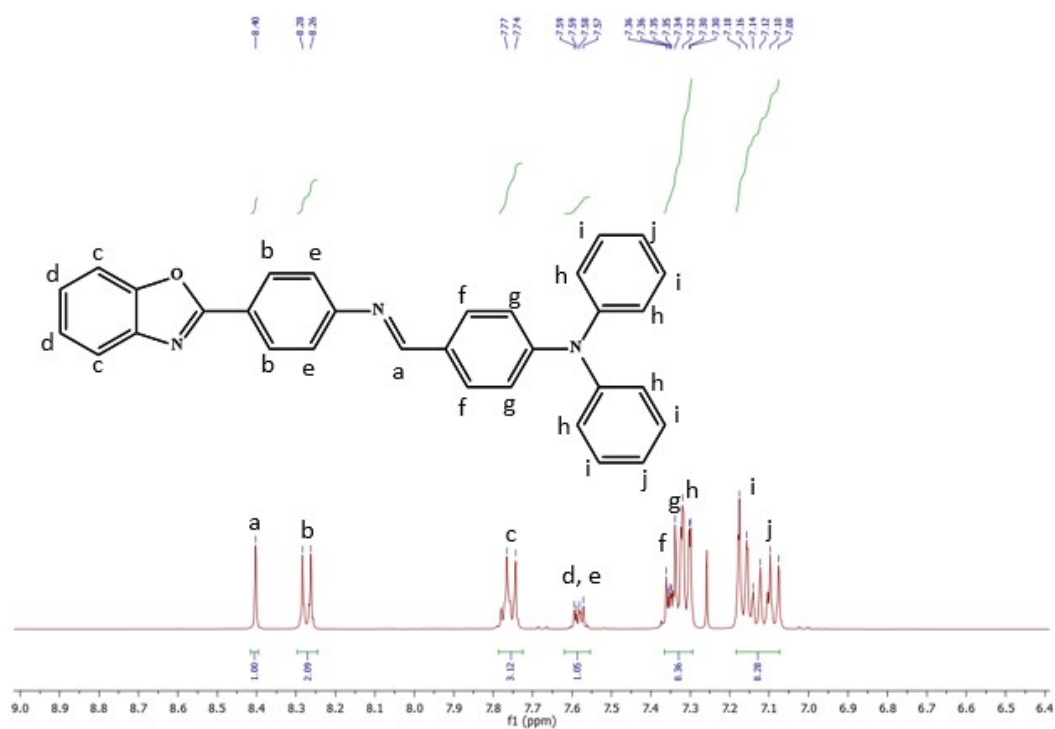

Fig. S1  $^1\text{H}$  NMR spectra of PMPA in  $\text{CDCl}_3$ .

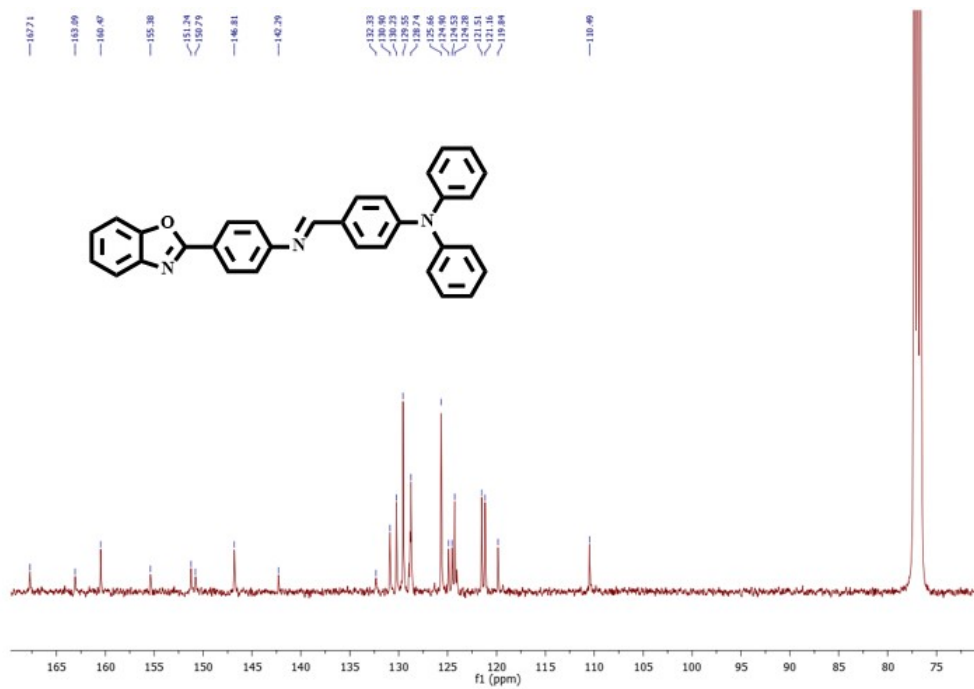

Fig. S2  $^{13}\text{C}$  NMR spectra of PMPA in  $\text{CDCl}_3$ .

# Target Screening Report

## Compound Spectra (overlaid)

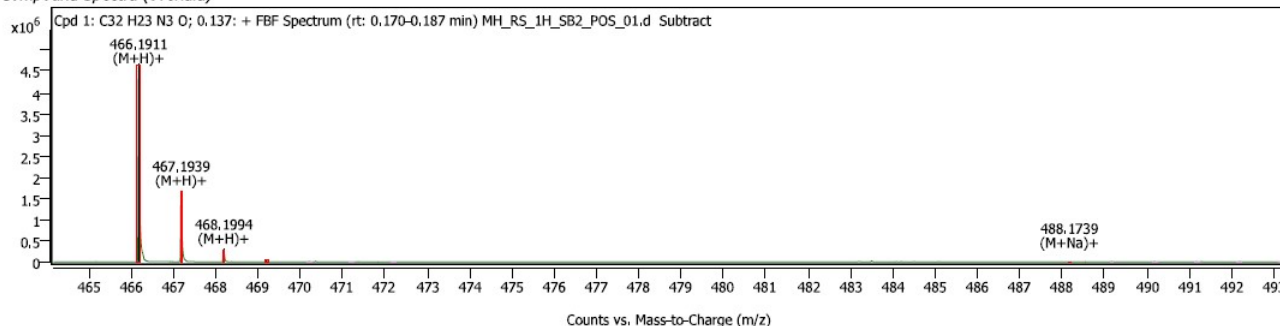

## Compound ID Table

| Name | Formula                                          | Species                                   | RT    | RT Diff | Mass     | CAS | ID Source | Score | Score (Lib) | Score (Tgt) |
|------|--------------------------------------------------|-------------------------------------------|-------|---------|----------|-----|-----------|-------|-------------|-------------|
|      | C <sub>32</sub> H <sub>23</sub> N <sub>3</sub> O | (M+H) <sup>+</sup><br>(M+Na) <sup>+</sup> | 0.137 |         | 465.1838 |     | FBF       | 99.02 | 99.02       | 99.02       |

Fig. S3 High-resolution mass spectra of our synthesized PMPA.

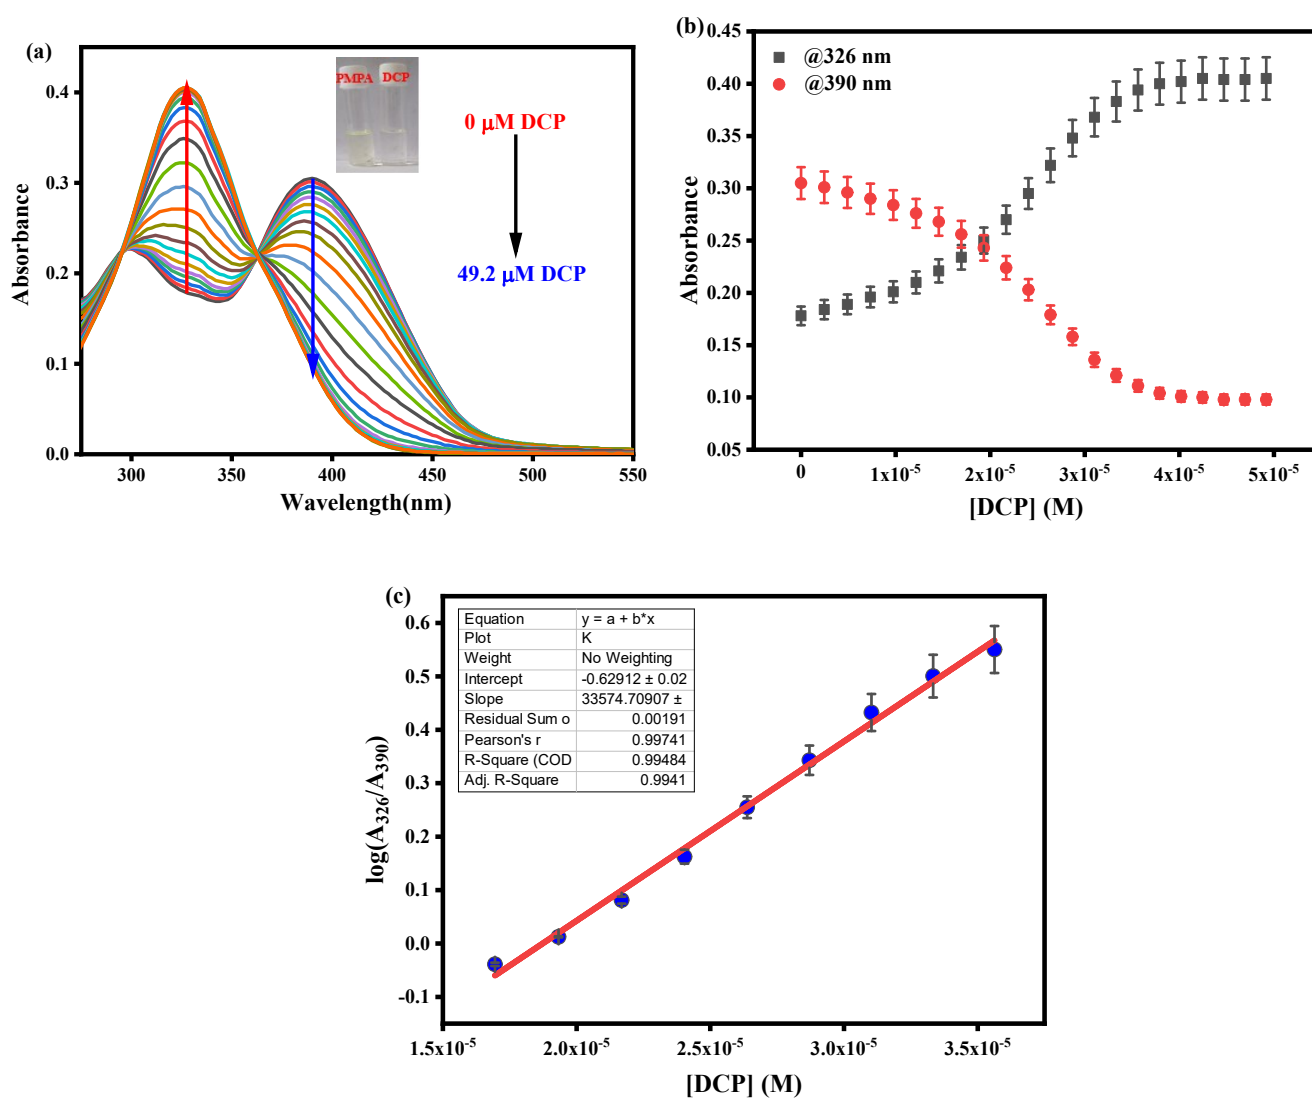

**Fig. S4** (a) UV-visible spectrophotometric spectra of PMPA (22  $\mu\text{M}$ ) upon steady addition of DCP (0-49.2  $\mu\text{M}$ ) in water-DMSO (4:1) medium and (b) the change of absorption behavior with increasing concentration of DCP at wavelengths 326 nm and 390 nm, respectively. (c) The ratiometric [DCP] vs.  $\log(A_{326}/A_{390})$  calibration curve for quantifying the unknown concentration of DCP with minimal experimental error.]

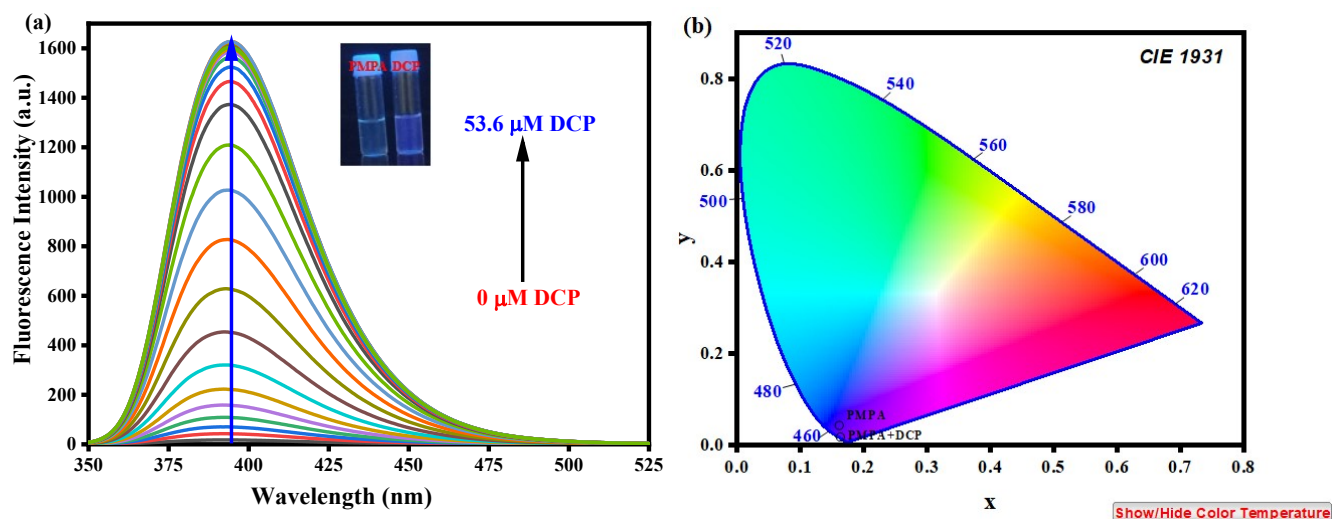

**Fig. S5** (a) Fluorometric titration spectrum of PMPA (22  $\mu\text{M}$ ) upon steady accumulation of DCP (0-53.6  $\mu\text{M}$ ) in water-DMSO (4:1) medium. (b) Fluorescence color before and after phosphorylation through CIE diagram, coordinates  $x = 0.1612$ ,  $y = 0.0429$  and  $x = 0.1629$ ,  $y = 0.0176$  respectively.

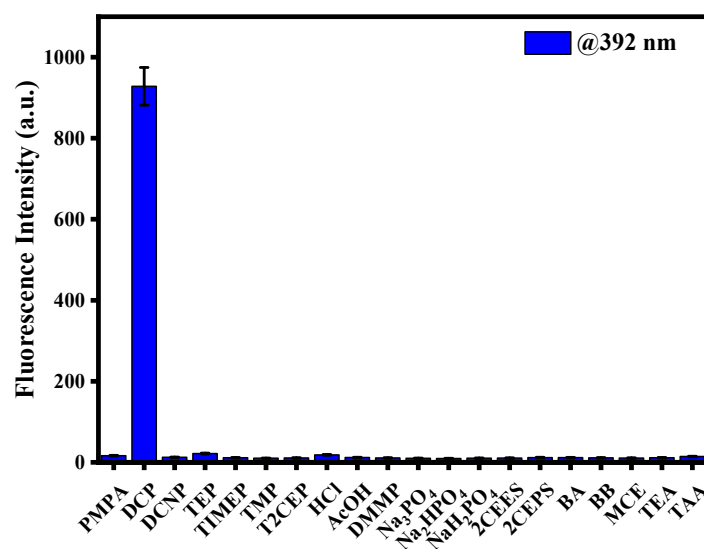

**Fig. S6** Bar plot on photoluminescence intensity change at 392 nm of **PMPA** solution in pure DMSO medium in the presence of several OPs, IPs, and other toxic guest analytes.

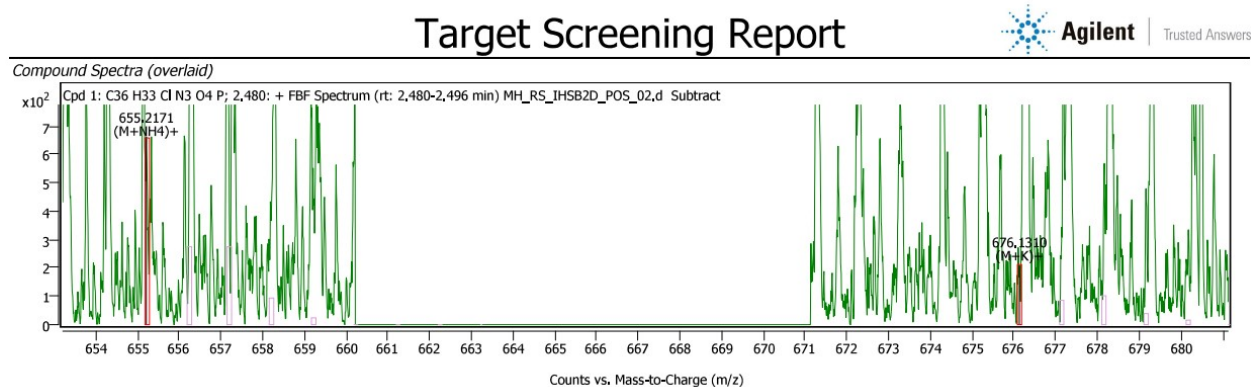

**Fig. S7** HRMS of phosphorylated product **PMPA-DCP** in DMSO.

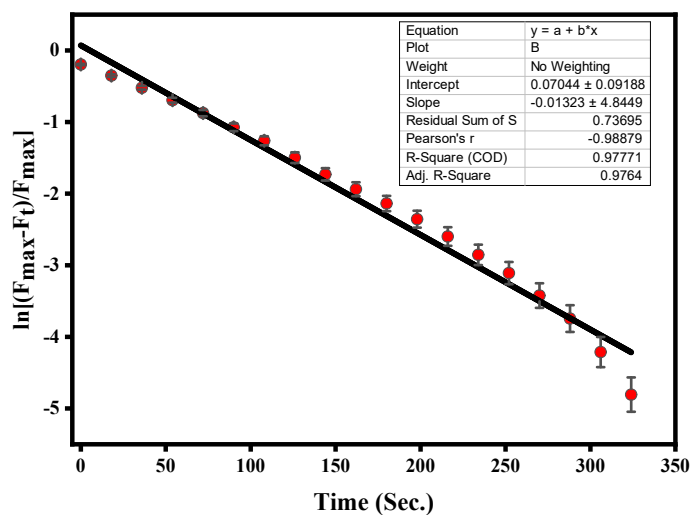

**Fig. S8** Pseudo first-order rate constant plot of **PMPA** (12.6  $\mu$ M) in the presence of **DCP** (90  $\mu$ M).

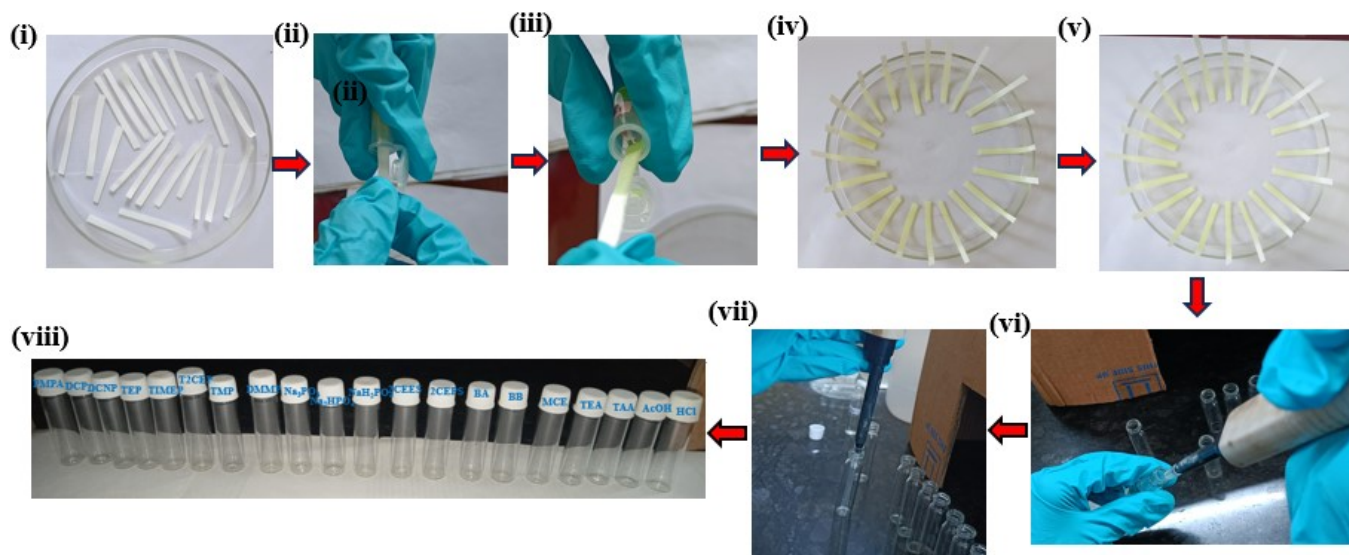

**Fig. S9** (i) Long-length cuts of several Whatman filter papers. (ii) The filter papers were immersed into the PMPA solution (1mM). (iii) Photo on **PMPA**-loaded filter papers. Picture of long-length cuts of filter papers (iv) before (v) after drying. (vi) Taking each OPs, IPs and other analytes having similar concentration by micropipette. (vii) Sincerely adding dropwise of each OPs, IPs and other analytes into vials. (viii) Arranging the vials in order to add the analytes to perform the “dipstick” experiment.

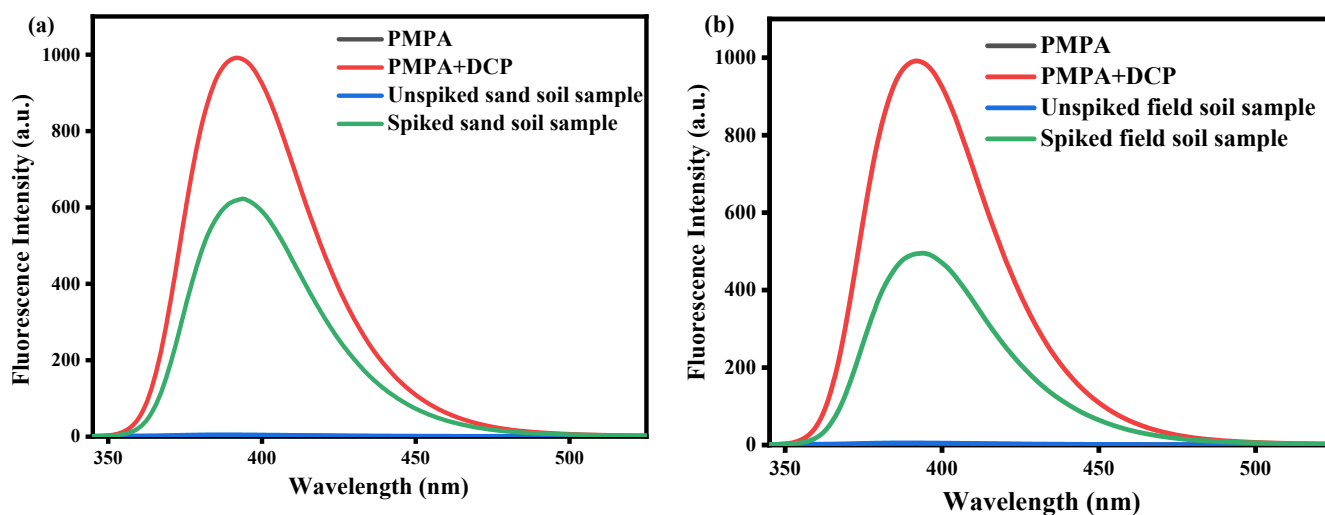



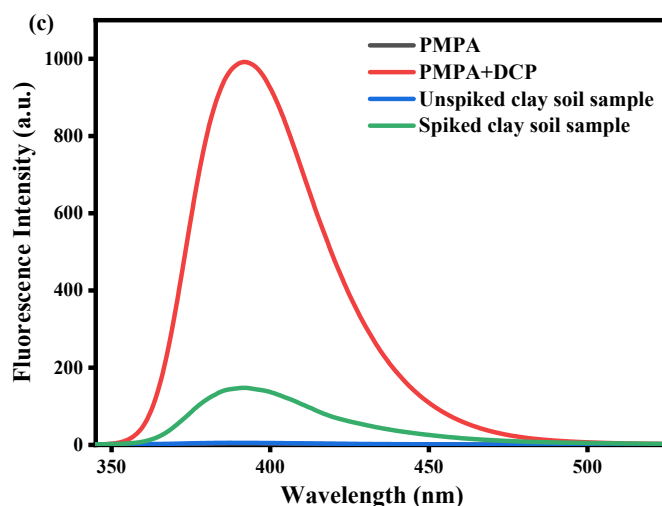

**Fig. S10** Emission spectra of PMPA solution in different spiked and unspiked soil samples such as (a) sand, (b) field, and (c) clay soil, respectively.

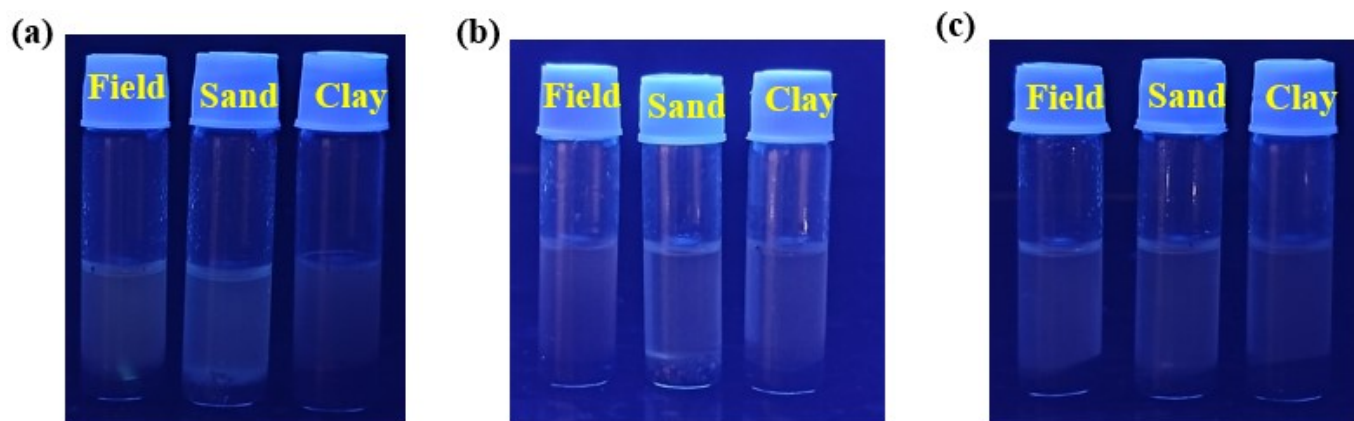

**Fig. S11** The characteristic photoluminescence photos of PMPA solution of different pesticides-spiked soil samples (a) boxer biostimulant, (b) cypermethrin, and (c) bifenthrin under 365 nm UV-lamp irradiation.

**Table S1** Comparison table of various probes and technologies for detecting organophosphates.

| Probe                                                                   | Technology                       | detecting organophosphates        | Ref. |
|-------------------------------------------------------------------------|----------------------------------|-----------------------------------|------|
| Rhodamine B hydrazide (RbH) - polyvinylpyrrolidone (PVP)                | Optical waveguides (OWGs)        | DCP                               | 1    |
| Radioactive nickel ( $^{63}\text{Ni}$ ) beta emission ionization source | Time-of-flight mass spectrometer | dimethyl methylphosphonate (DMMP) | 2    |

|                                                                                 |                                                      |                                                                                                                                         |                 |
|---------------------------------------------------------------------------------|------------------------------------------------------|-----------------------------------------------------------------------------------------------------------------------------------------|-----------------|
| Cystamine conjugate [(BocNH)Fc(CO)CSA] <sub>2</sub>                             | Electrochemical Sensors                              | EtSCH <sub>2</sub> CH <sub>2</sub> Cl, a simulant for sulfur mustard and (NC)(EtO) <sub>2</sub> P(O), a simulant for nerve agent Tabun. | 3               |
| Self-assembled composite layer of Cu <sup>2+</sup> /11-mercaptopundecanoic acid | Piezoresistive SiO <sub>2</sub> microcantilever      | dimethyl methylphosphonate (DMMP)                                                                                                       | 4               |
| La(III) 2-bis(carboxymethyl)amino hexadecanoic acid                             | Surface Acoustic Wave (SAW) sensor                   | Nerve agent sarin (GB)                                                                                                                  | 5               |
| Polymerized crystalline colloidal array (PCCA)                                  | Photonic Crystal                                     | Organophosphorus compound parathion                                                                                                     | 6               |
| hexafluoroisopropanol functionalized polythiophene                              | Carbon nanotube/polythiophene chemiresistive sensors | dimethyl methylphosphonate (DMMP)                                                                                                       | 7               |
| <b>triphenylamine–benzoxazole based</b>                                         | <b>Colorimetric, fluorometric</b>                    | <b>DCP</b>                                                                                                                              | <b>Our work</b> |

**Table S2 Comparison table of various chemosensors introduced for detecting nerve agent stimulants in the last few decades with our probe PMPA.**

| Sensors                                    | Type of response                     | Response Time  | Test kit                 | Detection limit        | Detection in gaseous phase | Ref. |
|--------------------------------------------|--------------------------------------|----------------|--------------------------|------------------------|----------------------------|------|
| squaraine-ethanolamine adducts             | Colorimetric                         | Not available  | Not available            | 3.5 μM                 | Not available              | 8    |
| Terpyridine based                          | Colorimetric fluorometric            | Few seconds    | vapor test<br>Paper test | 0.35 μM and 0.30 μM    | Yes                        | 9    |
| thiourea-based rhodamine                   | Colorimetric fluorometric            | Not available  | No                       | 2 μM                   | No                         | 10   |
| hydroxybenzylidenemalononitrile derivative | Colorimetric, fluorometric (turn-on) | Within minutes | Yes (Test strip method)  | 0.10, 0.11 and 0.20 μM | Yes                        | 11   |
| 4-diphenylamino-2-hydroxy                  | colorimetric and                     | 30 s.          | Not                      | 140 nM                 | Yes                        | 12   |

|                                                  |                                     |                        |                           |                               |               |                 |
|--------------------------------------------------|-------------------------------------|------------------------|---------------------------|-------------------------------|---------------|-----------------|
| benzaldehyde oxime                               | ratiometric                         |                        | mentioned                 |                               |               |                 |
| DASA-Derived Polymeric Probe                     | Colorimetric (On-off)               | Within 2 minutes       | vapor test                | 1mM                           | Yes           | 13              |
| bis-indolyl based chromogenic probe              | Colorimetric                        | Few minutes            | vapor test<br>Paper test  | 10.8 $\mu$ M                  | Yes           | 14              |
| Bifunctional azoaniline based                    | colorimetric                        | Within 1 min           | Not mentioned             | 0.2 mM                        | Not mentioned | 15              |
| Rhodamine based                                  | Colorimetric and fluoremetric       | Not mentioned          | Vapor test                | 0.2 $\mu$ M                   | Yes           | 16              |
| Polymer (BPAm-co-DMA-co-MPDEA)                   | colorimetric                        | Within few mins        | polymeric film            | 18.4 $\mu$ M                  | Yes           | 17              |
| di-methyltin derivative                          | Fluorometric (turn-off)             | Almost 2 minutes       | Yes (Spot Testing Device) | 0.023 and 0.092 mM            | Yes           | 18              |
| fluorene-pyrene copolymer                        | Fluorometric (turn-on)              | Within 3 seconds       | Yes (Test strip method)   | 132 ppb                       | Yes           | 19              |
| pyrene based turn-on fluorescent polymeric probe | ON/OFF reversible fluorescence      | Few minutes            | Quartz Plate vapor test   | 0.1 mM                        | Yes           | 20              |
| benzothiazole-based                              | Fluorometric                        | Not available          | Not available             | 0.43 $\mu$ M                  | Not available | 21              |
| Xanthene                                         | Colorimetric, fluorometric (turnon) | Not mentioned          | Not mentioned             | 1.36 $\mu$ M and 26 $\mu$ M   | NA            | 22              |
| BODIPY-based fluorescent probe                   | fluorometric                        | within 540 s           | Test paper                | 20.7 ppb                      | Not mentioned | 23              |
| <b>triphenylamine-benzoxazole-based</b>          | <b>Colorimetric, fluorometric</b>   | <b>Within a minute</b> | <b>(Dipstick method)</b>  | <b>0.42 <math>\mu</math>M</b> | <b>Yes</b>    | <b>Our work</b> |

## References

- 1 B. Du, Z. Tong, X. Mu, S. Liu, J. Xu, Z. Liu, Z. M. Qi and Z. Ding, *Anal. Methods*, 2019, **11**, 1208–1213.
- 2 W. E. Steiner, S. J. Klopsch, W. A. English, B. H. Glowers and H. H. Hill, *Anal. Chem.*, 2005, **77**, 4792–4799.
- 3 M. A. K. Khan, Y. T. Long, G. Schatte and H. B. Kraatz, *Anal. Chem.*, 2007, **79**, 2877–2884.
- 4 G. Zuo, X. Li, P. Li, T. Yang, Y. Wang, Z. Cheng and S. Feng, *Anal. Chim. Acta*, 2006, **580**, 123–

127.

- 5 M. S. Nieuwenhuizen and J. L. N. Hartevelde, *Sensors Actuators B Chem.*, 1997, **40**, 167–173.
- 6 J. P. Walker and S. A. Asher, *Anal. Chem.*, 2005, **77**, 1596–1600.
- 7 F. Wang, H. Gu and T. M. Swager, *J. Am. Chem. Soc.*, 2008, **130**, 5392–5393.
- 8 J. Zhao, M. Qin, J. You, K. Liu, L. Ding, T. Liu, J. Kong and Y. Fang, *Dye. Pigment.*, 2022, **197**, 109870.
- 9 P. Zheng, Z. Cui, H. Liu, W. Cao, F. Li and M. Zhang, *J. Hazard. Mater.*, , DOI:10.1016/J.JHAZMAT.2021.125619.
- 10 S. Li, Y. Zheng, W. Chen, M. Zheng, H. Zheng, Z. Zhang, Y. Cui, J. Zhong and C. Zhao, *Molecules*, , DOI:10.3390/MOLECULES24050827.
- 11 S. S. Ali, A. Gangopadhyay, A. K. Pramanik, S. K. Samanta, U. N. Guria, S. Manna and A. K. Mahapatra, *Analyst*, 2018, **143**, 4171–4179.
- 12 S. S. Ali, A. Gangopadhyay, A. K. Pramanik, U. N. Guria, S. K. Samanta and A. K. Mahapatra, *Dye. Pigment.*, 2019, **170**, 107585.
- 13 A. Balamurugan and H. Il Lee, *Macromolecules*, 2016, **49**, 2568–2574.
- 14 N. Dey, S. Jha and S. Bhattacharya, *Analyst*, 2018, **143**, 528–535.
- 15 M. Gupta and P. H. il Lee, *Sensors Actuators B Chem.*, 2017, **242**, 977–982.
- 16 S. Goswami, A. Manna and S. Paul, *RSC Adv.*, 2014, **4**, 21984–21988.
- 17 T. N. Annisa, S. H. Jung, M. Gupta, J. Y. Bae, J. M. Park and H. Il Lee, *ACS Appl. Mater. Interfaces*, 2020, **12**, 11055–11062.
- 18 N. Singh, K. Kumar, N. Srivastav, R. Singh, V. Kaur, J. P. Jasinski and R. J. Butcher, *New J.*

- Chem.*, 2018, **42**, 8756–8764.
- 19 H. Jiang, P. Wu, Y. Zhang, Z. Jiao, W. Xu, X. Zhang, Y. Fu, Q. He, H. Cao and J. Cheng, *Anal. Methods*, 2017, **9**, 1748–1754.
- 20 M. Gupta and H. Il Lee, *undefined*, 2017, **50**, 6888–6895.
- 21 M. K. Das, T. Mishra, S. Guria, D. Das, J. Sadhukhan, S. Sarker, K. Dutta, A. Adhikary, D. Chattopadhyay and S. S. Adhikari, *New J. Chem.*, 2022, **47**, 250–257.
- 22 K. C. Behera and B. Bag, *Chem. Commun.*, 2020, **56**, 9308–9311.
- 23 Z. Lu, W. Fan, X. Shi, C. A. Black, C. Fan and F. Wang, *Sensors Actuators B Chem.*, 2018, **255**, 176–182.
